# Supplementary material for: Food insecurity amongst universal credit claimants: the benefits and nutrition study (BEANS), a cross-sectional online study
Source: Springer Nature journal article supplement (doi:10.1007/s00394-025-03596-y), 2025-03-10
Supplement: MOESM1 [file 394_2025_3596_MOESM1_ESM.pdf]

**Food insecurity amongst Universal Credit claimants and nutritional security of females with a claim for Universal Credit: Benefits and Nutrition Study (BEANS), a cross sectional online study.**

Michelle Thomas<sup>1</sup>, Peter Rose<sup>1</sup>, Lisa Coneyworth<sup>1</sup>, Juliet Stone<sup>2</sup>, Matt Padley<sup>2</sup>, Patrick O'Reilly<sup>3</sup> and Simon Welham<sup>1</sup>

<sup>1</sup> School of Biosciences, Food Nutrition and Dietetics, University of Nottingham, Sutton Bonnington Campus, Nr Loughborough, LE12 5RD, UK

<sup>2</sup> Centre for Research in Social Policy, Loughborough University, Room U130 Brockington Building, Loughborough, Leicestershire LE11 3TU, UK

<sup>3</sup> School of humanities and social sciences, John Foster Building, Liverpool John Moores University, Liverpool, L3 5UZ

**Corresponding Author:** Dr Simon Welham

Email [simon.welham@nottingham.ac.uk](mailto:simon.welham@nottingham.ac.uk)

**Supplementary Table 1** Number of servings or weight (g) of food in the adequacy category required to achieve maximum score of 5 based on energy intake groups.

| Energy (kcal) | Food group         |        |       |            |
|---------------|--------------------|--------|-------|------------|
|               | Vegetables         | Fruits | Grain | Fibre      |
|               | Number of servings |        |       | Weight (g) |
| <1700         | 3                  | 2      | >= 6  | 20         |
| >=1700- <2200 | 4                  | 3      | >= 9  | 25         |
| >=2700        | 5                  | 4      | >= 11 | 30         |

Adapted from the scoring system as describe by Mariscal-Arcas et al <sup>62</sup>

**Supplementary Table 2** Serving sizes based on BDA (British Dietetic Association) serving size guidelines (average taken for milk and milk products based on portion size for milk and yogurt)

| DQI category    |                      | Food group                     | Serving size (g) | Half serving size (g) |
|-----------------|----------------------|--------------------------------|------------------|-----------------------|
| Overall Variety | Within group variety | Meat                           | 90               | 45                    |
| Overall Variety | Within group variety | Poultry                        | 90               | 45                    |
| Overall Variety | Within group variety | Fish                           | 140              | 70                    |
| Overall Variety | Within group variety | Eggs                           | 120              | 60                    |
| Overall Variety | Within group variety | Dairy (Milk and milk products) | 170              | 85                    |
|                 |                      | Dairy (cheese)                 | 30               | 15                    |
| Overall Variety | Within group variety | Dairy (Beans)                  | 150              | 75                    |
| Overall Variety | Adequacy             | Grains (Bread and cereal)      | 35               |                       |
| Overall Variety | Adequacy             | Grains (Rice and pasta)        | 150              |                       |
| Overall Variety | Adequacy             | Fruits and vegetables          | 80               |                       |

Variety within protein sources, values >= ½ a serving were considered as a meaningful quantity as per recommendations in Kim et al study.

Empty calorie foods: selected based on Eatwell guide for foods to be eaten less frequently.

NDNS data: Categories as laid out in the person level dietary data. Fruit recalculated to included fruit juice 100% to a maximum qty of 150ml

**Supplementary Table 3** The proportion of respondents across each of the food security domains who are within one of Body Mass Index categories and their self-reported health.

[illegible]

**Supplementary Table 4** Estimated daily macronutrient intakes from diet only amongst females aged 23-61 years in BEANs and the NDNS year's 9-11 Equivalised household income tertiles.

|                                     | BEANs (n =43)      |         |         | EQV1 (n =202)      |         |         |       | EQV 2 (n =202)     |         |         |       | EQV 3 (n =249)     |       |         |        |
|-------------------------------------|--------------------|---------|---------|--------------------|---------|---------|-------|--------------------|---------|---------|-------|--------------------|-------|---------|--------|
|                                     | Median Percentiles |         |         | Median Percentiles |         |         |       | Median Percentiles |         |         |       | Median Percentiles |       |         |        |
|                                     | 25                 | 75      |         | 25                 | 75      | P value |       | 25                 | 75      | P value |       | 25                 | 75    | P value |        |
| Total energy (kcal) diet only       | 1443               | (1086)  | (1723)  | 1520 <sup>a</sup>  | (1204)  | (1771)  | 0.310 | 1546 <sup>a</sup>  | (1296)  | (1799)  | 0.080 | 1660 <sup>b</sup>  | 1330  | 1946    | 0.006  |
| Protein (g) diet only               | 55.4               | (39.1)  | (78.3)  | 59.3 <sup>a</sup>  | (49.5)  | (73.4)  | 0.331 | 66.0 <sup>a</sup>  | (52.0)  | (79.0)  | 0.040 | 68.8 <sup>b</sup>  | 58.5  | 82.2    | 0.002  |
| Fat (g) diet only                   | 51.4               | (35.2)  | (60.1)  | 57.6 <sup>a</sup>  | (39.8)  | (71.7)  | 0.068 | 57.6 <sup>ab</sup> | (43.8)  | (71.5)  | 0.017 | 61.8 <sup>b</sup>  | 47.1  | 79.7    | <0.001 |
| Saturated fatty acids (g) diet only | 17.6               | (13.4)  | (25.8)  | 21.4               | (13.9)  | (27.6)  | 0.272 | 19.9               | (14.8)  | (27.5)  | 0.285 | 21.6               | 15.5  | 29.1    | 0.032  |
| Carbohydrate (g) diet only          | 187.4              | (142.6) | (230.7) | 182.5              | (145.1) | (217.9) | 0.813 | 187.7              | (145.5) | (224.4) | 0.904 | 189.8              | 149.5 | 230.4   | 0.613  |

P values are comparison of BEANs to NDNS equivalised household income tertiles Mann Whitney

Superscript letter denotes significant differences between the NDNS Equivalised household income tertiles only.

**Supplementary table 5** Comparison of energy and micronutrient intakes (percentage of the RNI and % below LRNI) amongst females aged 23-61 years with and income an income from Universal Credit (BEANS) and per the criteria for equivalised income tertiles in the National Diet and Nutrition Survey (years 9-11).

|                             | Beans (n = 43)  |        |        | EQV 1 (n =202)    |        |        |         | EQV 2 (n=202)     |        |        |         | EQV 3 (n =249)     |                  |                  |                              |
|-----------------------------|-----------------|--------|--------|-------------------|--------|--------|---------|-------------------|--------|--------|---------|--------------------|------------------|------------------|------------------------------|
|                             | Median          | 25th   | 75th   | Median            | 25th   | 75th   | P value | Median            | 25th   | 75th   | P value | Median             | 25 <sup>th</sup> | 75 <sup>th</sup> | P value P value (EQV's only) |
| Energy (kcal)               | 1443            | (1086) | (1723) | 1520 <sup>a</sup> | (1204) | (1771) | 0.310   | 1546 <sup>a</sup> | (1296) | (1799) | 0.08    | 1660 <sup>b</sup>  | 1330             | 1946             | 0.006                        |
|                             | n (total)       | n      | (%)    | n (total)         | n      | (%)    | P value | n (total)         | n      | (%)    | P value | n (total)          | n                | (%)              | P value                      |
| Underreporting <sup>β</sup> | 38 <sup>T</sup> | 19     | (50.0) | 183 <sup>TF</sup> | 57     | (31.1) | 0.026   | 183 <sup>TF</sup> | 38     | (20.8) | <0.001  | 233 <sup>FFF</sup> | 50               | (21.5)           | <0.001 0.031                 |

T five participants did not record a height or weight.

TF 19 participants did not record a height or weight.

FFF 16 participants did not record height or weight.

**Supplementary table 6** Estimated daily micronutrient intakes from diet only amongst females aged 23-61 years in BEANs and the NDNS year's 9-11 Equivalised household income tertiles.

|                                      | Beans (n =43) |             |          | Lowest (n =202) EQV 1 |             |          |         | Middle (n=202) EQV 2 |             |          |         | Highest (n =249) EQV 3 |             |          |         |
|--------------------------------------|---------------|-------------|----------|-----------------------|-------------|----------|---------|----------------------|-------------|----------|---------|------------------------|-------------|----------|---------|
|                                      | Median        | Percentiles |          | Median                | Percentiles |          | P value | Median               | Percentiles |          | P value | Median                 | Percentiles |          | P value |
|                                      |               | (25)        | (75)     |                       | (25)        | (75)     |         |                      | (25)        | (75)     |         |                        | (25)        | (75)     |         |
| Vitamin A (retinol equivalents) (µg) | 410.8         | (288.5)     | (547.4)  | 564.6 <sup>a</sup>    | (354.3)     | (835.8)  | 0.003   | 656.6 <sup>a</sup>   | (424.6)     | (995.3)  | <0.001  | 811.6 <sup>b</sup>     | (497.1)     | (1377.2) | <0.001  |
| Thiamine (mg)                        | 1.1           | (0.9)       | (1.6)    | 1.2 <sup>a</sup>      | (0.9)       | (1.5)    | 0.857   | 1.3 <sup>b</sup>     | (1.1)       | (1.6)    | 0.097   | 1.4 <sup>c</sup>       | (1.1)       | (1.7)    | 0.003   |
| Riboflavin (mg)                      | 1.2           | (0.8)       | (1.7)    | 1.2 <sup>a</sup>      | (0.9)       | (1.5)    | 0.639   | 1.3 <sup>a</sup>     | (1.0)       | (1.6)    | 0.198   | 1.5 <sup>b</sup>       | (1.2)       | (1.9)    | 0.001   |
| Niacin equivalent (mg)               | 25.5          | (18.5)      | (35.8)   | 27.4 <sup>a</sup>     | (21.9)      | (34.0)   | 0.634   | 30.1 <sup>ab</sup>   | (24.2)      | (36.7)   | 0.116   | 31.6 <sup>b</sup>      | (26.2)      | (37.2)   | 0.023   |
| Vitamin B6 (mg)                      | 1.3           | (0.9)       | (1.7)    | 1.3 <sup>a</sup>      | (1.1)       | (1.6)    | 0.189   | 1.4 <sup>a</sup>     | (1.1)       | (1.8)    | 0.019   | 1.5 <sup>b</sup>       | (1.2)       | (1.8)    | <0.001  |
| Vitamin B12 (µg)                     | 3.5           | (2.0)       | (4.9)    | 3.8 <sup>a</sup>      | (2.6)       | (5.1)    | 0.221   | 3.9 <sup>ab</sup>    | (2.9)       | (5.4)    | 0.040   | 4.5 <sup>b</sup>       | (3.1)       | (5.7)    | 0.004   |
| Folate (µg)                          | 169.3         | (119.6)     | (201.8)  | 172.4 <sup>a</sup>    | (135.6)     | (225.5)  | 0.161   | 189.5 <sup>a</sup>   | (150.2)     | (231.9)  | 0.006   | 219.1 <sup>b</sup>     | (174.5)     | (277.4)  | <0.001  |
| Vitamin C (mg)                       | 43.5          | (27.7)      | (100)    | 50.0 <sup>a</sup>     | (32.6)      | (81.7)   | 0.522   | 64.0 <sup>b</sup>    | (44.2)      | (99.5)   | 0.019   | 80.9 <sup>c</sup>      | (55.0)      | (111.3)  | <0.001  |
| Sodium (mg)                          | 1651.7        | (1253.9)    | (2092.4) | 1696.5                | (1347.2)    | (2131.2) | 0.815   | 1670.9               | (1339.7)    | (2178.4) | 0.733   | 1862.9                 | (1408.5)    | (2248.1) | 0.252   |
| Potassium (mg)                       | 2199.3        | (1710.7)    | (2841.9) | 2274.5 <sup>a</sup>   | (1871.9)    | (2709.7) | 0.762   | 2483.2 <sup>b</sup>  | (2030.3)    | (3000.6) | 0.034   | 2756.7 <sup>c</sup>    | (2347.6)    | (3282.9) | <0.001  |
| Calcium (mg)                         | 714.7         | (490.5)     | (956.9)  | 648.1 <sup>a</sup>    | (496.9)     | (849.6)  | 0.246   | 679.1 <sup>a</sup>   | (522.4)     | (856.6)  | 0.422   | 773.7 <sup>b</sup>     | (609.4)     | (945.5)  | 0.350   |
| Magnesium (mg)                       | 203.9         | (158.6)     | (276.3)  | 204.9 <sup>a</sup>    | (164.8)     | (251.9)  | 0.760   | 229.4 <sup>b</sup>   | (185.6)     | (277.6)  | 0.128   | 260.5 <sup>c</sup>     | (217.1)     | (313.3)  | <0.001  |
| Phosphorus (mg)                      | 1002.9        | (679.1)     | (1358.0) | 1022.1 <sup>a</sup>   | (812.4)     | (1243.3) | 0.872   | 1090.1 <sup>a</sup>  | (876.9)     | (1297.0) | 0.238   | 1170.2 <sup>b</sup>    | (1002.1)    | (1404.8) | 0.009   |
| Copper (mg)                          | 0.9           | (0.6)       | (1.1)    | 0.9 <sup>a</sup>      | (0.7)       | (1.1)    | 0.294   | 1.0 <sup>b</sup>     | (0.8)       | (1.2)    | 0.010   | 1.1 <sup>c</sup>       | (0.9)       | (1.5)    | 0.000   |
| Zinc (mg)                            | 6.4           | (4.7)       | (8.8)    | 6.8 <sup>a</sup>      | (5.4)       | (8.2)    | 0.646   | 7.4 <sup>a</sup>     | (5.9)       | (8.9)    | 0.131   | 8.0 <sup>b</sup>       | (6.4)       | (9.7)    | 0.004   |
| Iodine (µg)                          | 104.2         | (60.4)      | (146.9)  | 111.8 <sup>a</sup>    | (80.0)      | (144.8)  | 0.211   | 124.4 <sup>a</sup>   | (90.4)      | (156.6)  | 0.018   | 140.4 <sup>b</sup>     | (101.7)     | (200.6)  | <0.001  |
| Selenium (µg)                        | 27.38         | (21.8)      | (48.6)   | 37.9 <sup>a</sup>     | (28.3)      | (48.0)   | 0.021   | 40.1 <sup>a</sup>    | (31.2)      | (52.5)   | <.001   | 45.5 <sup>b</sup>      | (34.2)      | (56.9)   | <0.001  |
| Iron (mg) <=50 years                 | 7.9           | (5.6)       | (9.28)   | 8.5 <sup>a</sup>      | (6.5)       | (10.5)   | 0.193   | 9.2 <sup>a</sup>     | (7.1)       | (11.0)   | 0.024   | 10.2 <sup>b</sup>      | (7.7)       | (11.9)   | <0.001  |
| Iron (mg) >50 years                  | 6.3           | (4.0)       | (11.1)   | 7.4 <sup>a</sup>      | (5.3)       | (9.4)    | 0.262   | 8.7 <sup>b</sup>     | (7.3)       | (10.2)   | 0.013   | 9.8 <sup>b</sup>       | (8.1)       | (11.9)   | <0.001  |

P values are comparison of BEANs to NDNS equivalised household income tertiles.

Superscript letter denotes significant differences between the NDNS Equivalised household income tertiles only

<=50 years n = 36

>50 years n =7

**Supplementary Table 7** Comparison of frequency and access of foodbank amongst BEANs participants before uprating was in place and after its removal.

| Categories                                     | Total |        |
|------------------------------------------------|-------|--------|
|                                                | n     | (%)    |
| Not accessed the food bank before or after     | 135   | (44.7) |
| Accessed foodbank before and after.            | 89    | (29.5) |
| Accessed after food bank after but not before. | 62    | (20.5) |
| Accessed foodbank before but not after.        | 16    | (5.3)  |
| Total                                          | 316   | (100)  |

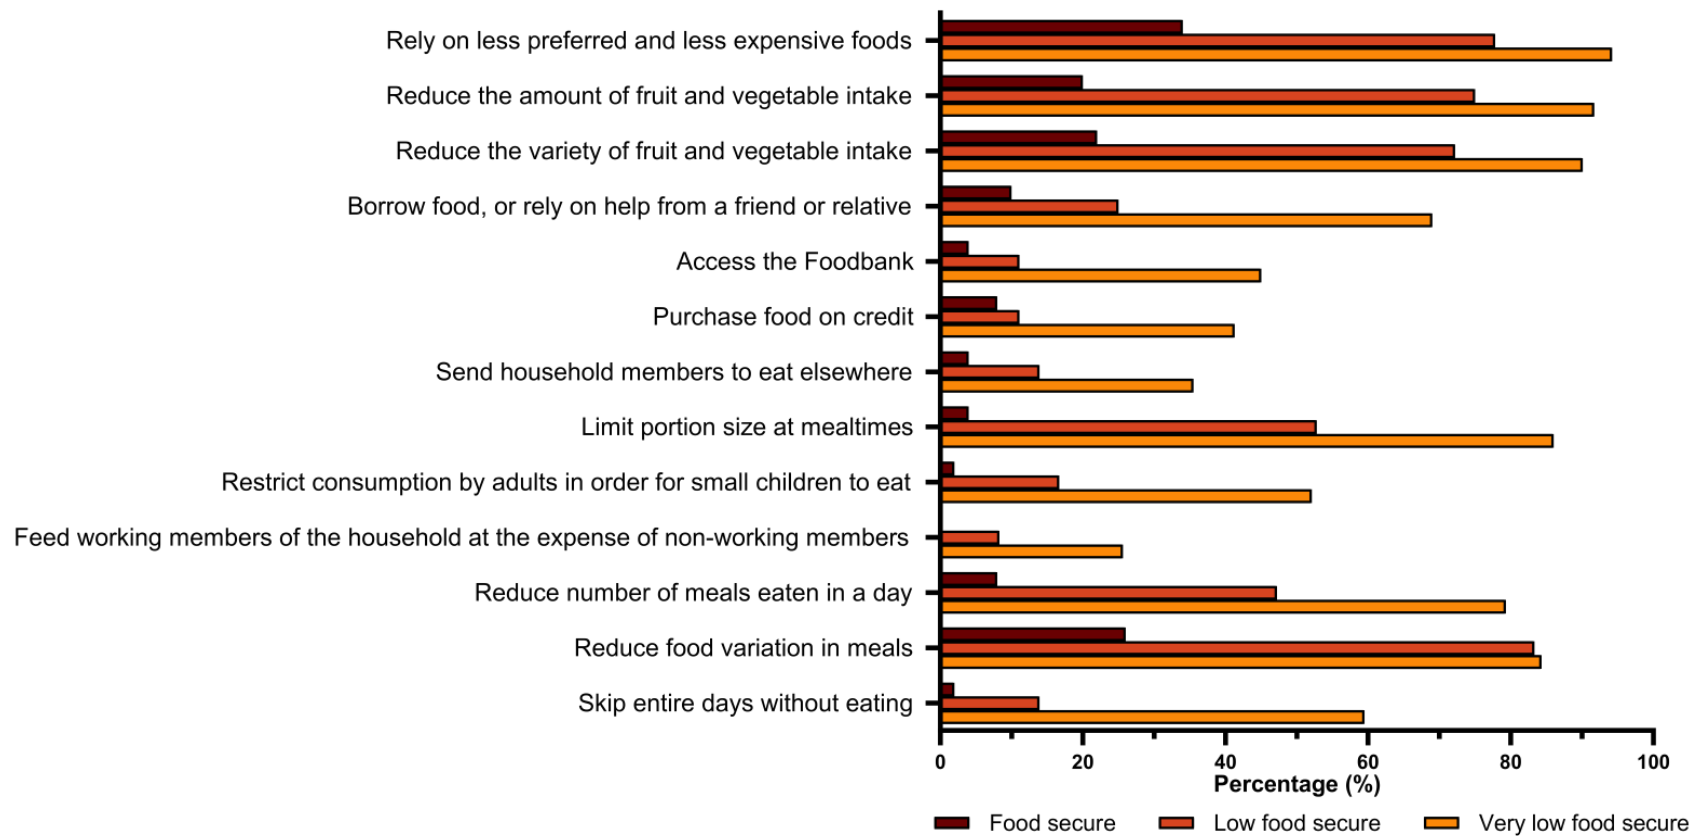

**Supplementary Fig 1** Response rate for the type of coping strategies type used in the previous 7 days for food secure, low food secure and very low food secure.

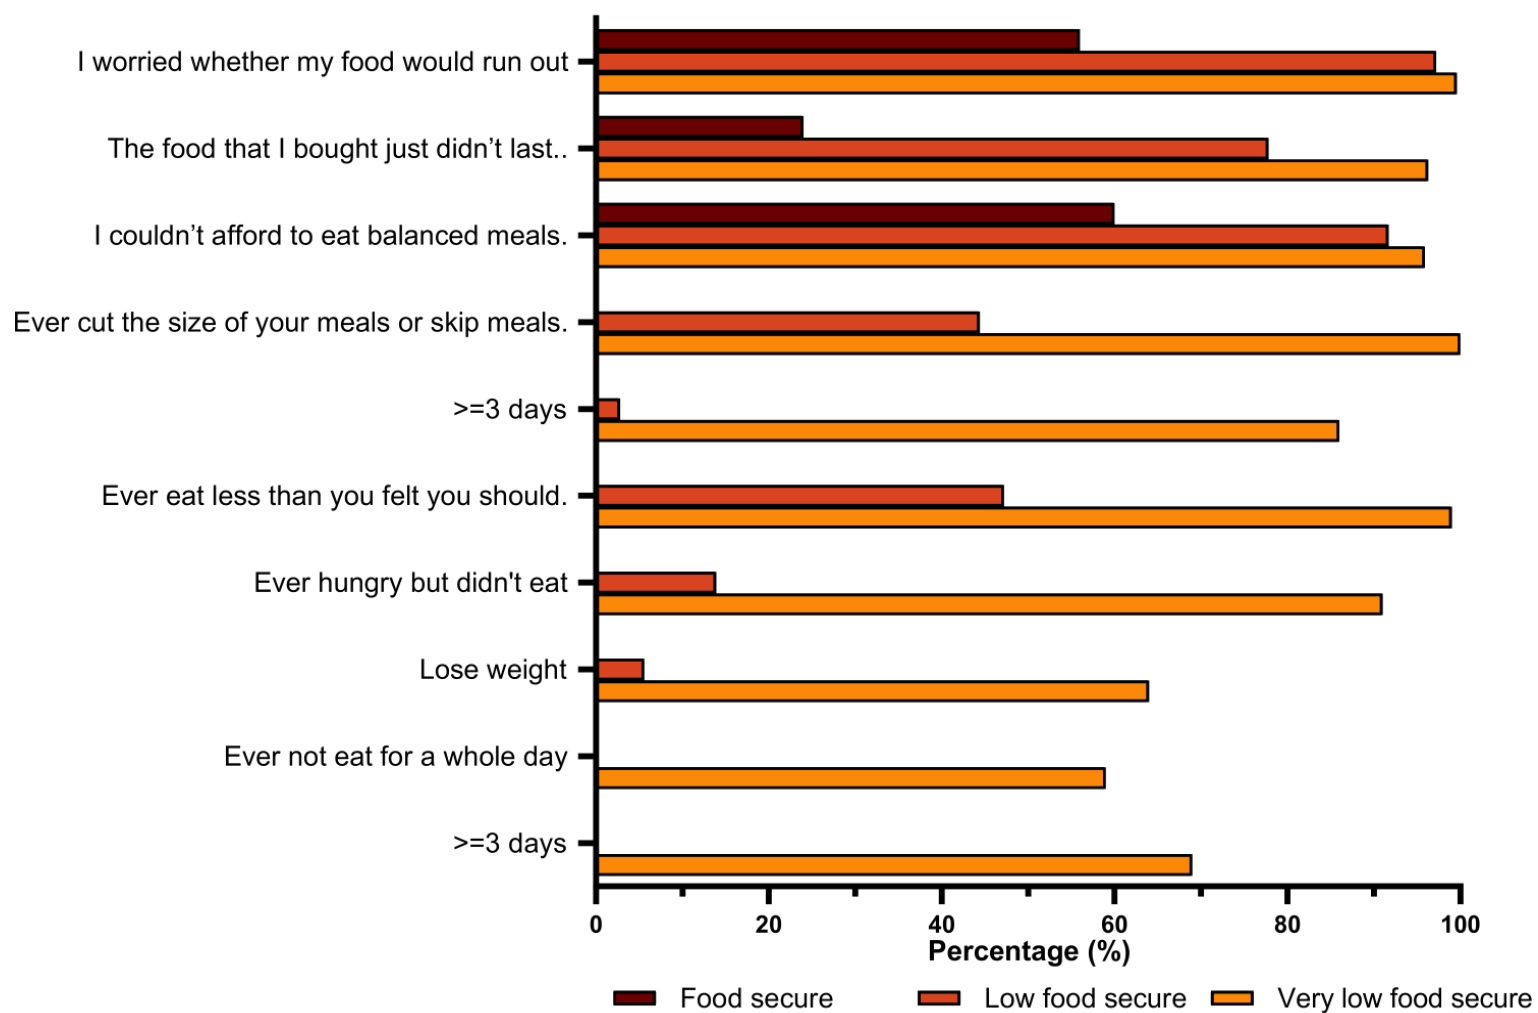

**Supplementary Fig 2** Response rate for adult food security module split by food secure, low food secure and very low food secure
